# Supplementary material for: Label-Free Morphology-Based Prediction of Multiple Differentiation Potentials of Human Mesenchymal Stem Cells for Early Evaluation of Intact Cells
Source: PLoS One. 2014 Apr 4;9(4):e93952. doi: 10.1371/journal.pone.0093952 (PMC3976343; doi:10.1371/journal.pone.0093952)
Supplement: Table S2 — Gene list in custom designed gene chip microarray. (XLSX) [file pone.0093952.s006.xlsx]

## Sheet: Supplementary Table 7
Table S2. Gene list in GenoPerl® microarray
Gene symbol
ACAN [aggrecan]
ACTA2
ACTN1
ACTN2
ADIPOQ [adiponectin]
ALPI
ARFIP2
BGLAP [osteocalcin]
BMI1
BMP2
CD105 [ENG]
CD14
CD146 [MCAM]
CD166 [ALCAM]
CD29 [ITGB1]
CD31 [PECAM1]
CD34
CD45 [PTPRC]
CD49 [ITGA1]
CD73 [NT5E]
CD90 [THY1]
CD95 [FAS]
CDC42(transcript variant 1)
CDC42(transcript variant 2)
CDKN1A [p21]
CDKN2A [p16]
CFL1
COL1A1
COL2A1
DCTN2 [dynactin 2]
DES [desmin]
GAPDH
GJA1
HLA-A
HLA-DRB1
IQGAP1
KLF4
KRAS
KRT25
KRT40
LEP [leptin]
LIMK1
LMNA
LPL [lipoprotein lipase]
MAP1A
MDM2
MMP1
MYC
PIK3CA
PROK1
PRPH
PTEN
PTK2
RAC1(transcript variant 1)
RAC1(transcript variant 2)
RAPGEF1
RDX
RHOA
ROCK
SPP [osteopontin]
SRC
SYNC
SYNM
TERF1
TERF2
TP53 [p53] (transcript variant 1)
TP53 [p53] (transcript variant 2)
TUBA1B
TUBB
