# Supplementary material for: Label-Free Morphology-Based Prediction of Multiple Differentiation Potentials of Human Mesenchymal Stem Cells for Early Evaluation of Intact Cells
Source: PLoS One. 2014 Apr 4;9(4):e93952. doi: 10.1371/journal.pone.0093952 (PMC3976343; doi:10.1371/journal.pone.0093952)
Supplement: Table S4 — Parameters and weights explored to contribute in prediction models for Potential I. (XLSX) [file pone.0093952.s008.xlsx]

## Sheet: Supplementary Table 2
	Table S4. Parameters and weights explored to contribute in prediction models for Potential I
	Prediction of Potential I (Osteogenic differentiation)
	Model 2			Model 3			Model 4			Model 5			Model 6			Model 7			Model 8			Model 9
	Constant	0.187806		Constant	0.188681		Constant	0.0308379		Constant	-0.11357		Constant	-0.0147327		Constant	-0.0728063		Constant	0.151432		Constant	-0.0741957
	GAPDH	-0.413186		Total area 24h	-0.139767		Count 24h	-0.0789158		Total area 48h q025	0.0761764		Total area 24h->48h q050	0.00055951		Total area 24h rkr	0.00557283		Hole area 24h->96h q050	-0.150553		Total area 24h q010	-0.125141
	TP53 [p53] (transcript variant 1)	-1.55513		Hole area 24h	0.0564115		Relative hole area 24h	0.147575		Total area 48h q050	0.0189351		Hole area 72h->96h q075	-0.199612		Total area 72h med	0.171603		Hole area 24h->96h q075	-0.0637618		Hole area 24h q050	0.0969542
	RAC1	0.463509		Relative hole area 24h	0.218643		Shape factor 24h	0.13822		Total area 72h q050	0.594526		Relative hole area 24h->48h q075	-0.127554		Total area 96h rkr	0.181497		Relative hole area 24h->96h q050	-0.000455572		Hole area 24h q075	0.0476278
	RHOA	0.150513		Fiber breadth 24h	-0.0290997		Elliptical form factor 48h	0.0204072		Total area 96h q025	-0.00143734		Relative hole area 72h->96h q075	-0.0826608		Hole area 24h iqr	0.0344874		Fiber breadth 24h->96h q090	-0.219999		Relative hole area 24h q050	0.017964
	TUBB	-0.22517		Count 48h	-0.122607		Count 96h	-0.0854117		Hole area 24h q075	0.370741		Breadth 48h->72h q090	-0.00642637		Hole area 24h rkr	-0.11841		Elliptical form factor 24h->96h q010	0.0297555		Shape factor 24h q090	0.18043
	GJA1	0.212147		Elliptical form factor 48h	0.325491		Breadth 96h	-0.199948		Hole area 48h q050	0.000379625		Fiber length 24h->48h q025	0.187265		Hole area 48h rsk	-0.0546798		Inner radius 24h->96h q010	-0.272975		Count 24h	-0.298198
	BGLAP [osteocalcin]	0.137905		Fiber length 72h	0.12823		Inner radius 96h	-0.0719667		Hole area 72h q050	-0.136808		Fiber length 24h->48h q050	0.0990511		Hole area 96h med	-0.0802651
	LEP [leptin]	0.0421397		Count 96h	-0.124204					Hole area 72h q075	0.229016		Fiber length 72h->96h q025	-0.0895875		Breadth 96h med	-0.063096
	ACAN [aggrecan]	-0.156081		Total area 96h	-0.0116633					Relative hole area 24h q050	0.0231044		Fiber breadth 48h->72h q090	-0.0196177		Breadth 96h rsk	-0.172648
	CD105 [ENG]	-0.0291387		Fiber length 96h	-0.00154229					Shape factor 48h q090	-0.00395336		Shape factor 24h->48h q090	-0.215774		Fiber length 72h med	0.209652
	CD73 [NT5]	-0.203133		Fiber breadth 96h	-0.124468					Elliptical form factor 24h q010	-0.128186		Elliptical form factor 24h->48h q050	0.121746		Fiber length 72h rsk	-0.100173
				Inner radius 96h	-0.0223591					Elliptical form factor 48h q050	0.121211		Elliptical form factor 72h->96h q010	0.271294		Fiber breadth 24h rsk	0.264537
				PIK3CA	-0.374242					Elliptical form factor 48h q090	0.207716		Inner radius 72h->96h q050	-0.169754		Fiber breadth 48h rkr	-0.165982
				RHOA	-0.011858					Elliptical form factor 96h q010	0.0444913					Fiber breadth 72h rsk	-0.108661
				TUBB	-0.0421182					Inner radius 24h q025	0.287578					Fiber breadth 72h rkr	-0.168694
				SPP1 [osteopontin]	0.0271934					Inner radius 96h q025	-0.555694					Shape factor 24h iqr	0.0888765
				ACAN [aggrecan]	-0.222412											Shape factor 24h rsk	0.0302129
				CD105 [ENG]	-0.0445188											Shape factor 24h rkr	-0.113821
																Elliptical form factor 96h rsk	0.170054
																Count 72h	-0.0040944
