# Supplementary material for: Label-Free Morphology-Based Prediction of Multiple Differentiation Potentials of Human Mesenchymal Stem Cells for Early Evaluation of Intact Cells
Source: PLoS One. 2014 Apr 4;9(4):e93952. doi: 10.1371/journal.pone.0093952 (PMC3976343; doi:10.1371/journal.pone.0093952)
Supplement: Table S5 — Parameters and weights explored to contribute in prediction models for Potential II. (XLSX) [file pone.0093952.s009.xlsx]

## Sheet: Supplementary Table 3
	Table S5. Parameters and weights explored to contribute in prediction models for Potential II
	Prediction of Potential II (Adipogenic differentiation)
	Model 2			Model 3			Model 4			Model 5			Model 6			Model 7			Model 8			Model 8
	Constant	0.192761		Constant	0.0326102		Constant	-0.00494697		Constant	-0.116557		Constant	-0.0726708		Constant	-0.1681		Constant	-0.0189289		Constant	0.084848
	TP53 [p53] (transcript variant 1)	-0.520909		Hole area 24h	0.114478		Count 24h	-0.487568		Total area 24h q010	-0.244599		Total area 24h->48h q010	0.197847		Total area 48h med	0.0610169		Total area 24h->96h q010	0.235906		Total area 24h q010	-0.0338545
	RHOA	0.700887		Relative hole area 24h	0.545422		Relative hole area 24h	0.865867		Total area 48h q050	0.000449227		Total area 48h->72h q025	-0.31669		Total area 72h rkr	-0.434775		Relative hole area 24h->96h q075	-0.674399		Hole area 24h q050	0.177553
	ACTN1	-0.256275		Fiber breadth 24h	0.20879		Fiber breadth 24h	0.106292		Total area 72h q010	-0.00392198		Total area 72h->96h q025	0.0456368		Hole area 48h rsk	0.0105854		Shape factor 24h->96h q075	-0.188209		Relative hole area 24h q075	0.176946
	CFL1	0.0818381		Inner radius 24h	0.133117		Shape factor 24h	0.0181614		Total area 96h q010	0.0873953		Total area 72h->96h q075	0.0882949		Relative hole area 24h iqr	0.489875		Count 24h->96h	0.270281		Relative hole area 24h q090	0.192215
	SYNM	-0.55202		Fiber breadth 48h	0.0224311		Inner radius 24h	0.571733		Hole area 24h q050	0.142925		Hole area 24h->48h q050	-0.045824		Relative hole area 48h rkr	0.00457161					Fiber breadth 24h q010	0.172004
	SYNC	-0.328769		GAPDH	0.0353185		Relative hole area 48h	-0.0583126		Hole area 72h q050	0.183305		Hole area 24h->48h q075	-0.423133		Breadth 72h rkr	-0.116609					Shape factor 24h q010	0.0301214
	GJA1	0.0368492		ACTN1	-0.273409		Fiber breadth 48h	0.0765542		Hole area 72h q075	0.00242006		Hole area 48h->72h q050	0.147786		Breadth 96h rkr	-0.0335789					Inner radius 24h q010	0.180163
	CD14	0.00762133		BGLAP [osteocalcin]	-0.00457332		Count 72h	0.197697		Hole area 72h q090	0.0354293		Relative hole area 24h->48h q075	-0.504004		Fiber breadth 48h iqr	0.107048					Inner radius 24h q050	0.0237257
	HLA-DRB1	-0.372903					Total area 72h	0.161675		Relative hole area 24h q075	0.191607		Relative hole area 48h->72h q090	0.0880354		Fiber breadth 72h rkr	-0.177511
	LIMK1	0.0522176					Relative hole area 96h	0.244704		Relative hole area 48h q075	-0.115087		Fiber length 24h->48h q010	0.0762548		Shape factor 24h med	0.0370352
							Fiber length 96h	0.0895951		Breadth 72h q010	-0.178015		Fiber length 72h->96h q010	0.00796861		Elliptical form factor 72h rsk	-0.0702905
							Shape factor 96h	-0.285964		Fiber breadth 24h q010	0.325706		Fiber length 72h->96h q075	0.000543242		Inner radius 24h med	0.365342
							Elliptical form factor 96h	0.10173		Inner radius 24h q010	0.0551559		Fiber length 72h->96h q090	0.00217602		Inner radius 24h rsk	-0.126853
										Inner radius 48h q025	0.366731		Shape factor 72h->96h q075	-0.00280106
													Elliptical form factor 24h->48h q010	0.0268007
													Elliptical form factor 24h->48h q025	0.00759687
													Elliptical form factor 72h->96h q075	0.0720432
													Inner radius 72h->96h q050	0.179174
													Count 24h->48h	0.000639492
													Count 48h->72h	0.11087
